# Supplementary material for: Temporal and sequential transcriptional dynamics define lineage shifts in corticogenesis
Source: PubMed Central journal article supplement — EMBO J. 2022 Nov 8;41(24):e111132. doi: 10.15252/embj.2022111132 (PMC9753470; doi:10.15252/embj.2022111132), 2022-11-08
Supplement: EMBJ-41-e111132-s003.pdf [file EMBJ-41-e111132-s003.pdf]

## Expanded View Figures

### Figure EV1. Experimental paradigm and validation of the transcriptional analyses.

- A *Hes5::GFP* and *Tbr2::GFP* transgenic mice used for cell isolation.
- B Expression of *Hes5::GFP* and *Tbr2::GFP* embryonic cortices at E17.5. Scale bar = 100  $\mu$ m. Arrowheads pointing to *Tbr2::GFP* cells in VZ. Immunostainings for Pax6 and Tbr2 with *Hes5::GFP* and *Tbr2::GFP* coronal sections from E17.5. Arrows point to GFP+Pax6+ cells and arrowheads point to GFP+Tbr2+ cells. Scale bar = 100  $\mu$ m.
- C Examples of FACS plots for GFP positive cell sorting at E14.5 *Hes5::GFP* and E15.5 *Tbr2::GFP*.
- D–F Expression validation of *Hes5::GFP* and *Tbr2::GFP* positive cells after FAC sorting *in vitro*. Scale bar = 20  $\mu$ m.
- G Expression plots of some known markers of NSCs. Each dot defines the mean and lines define the SD. Three to four biological replicates were collected for each time point.
- H Heatmap showing differentially expressed genes in three cell populations illustrating NSCs, BPs and NBNs vary in expression, based on z-scored log<sub>2</sub>(TPM) expression values.
- I Bar plot representing the proportion of variance covered by each PC in PCA of all cell types.
- J, L, N Volcano plots for DEG analysis for NSCs versus BPs, NSCs versus NBNs and BPs versus NBNs, respectively. Significantly DEGs are colored as gray and top 100 DEGs are colored by red.
- K, M, O Top 10 DEGs for NSCs versus BPs, NSCs versus NBNs, and BPs versus NBNs, respectively. Central band is the median, the whiskers define the upper and lower limit, and the box defines the interquartile ranges. (J–O) are related to analysis of Fig 1E. The range of *P*-values is very different: NSC (0.01–0.4%), BP (1.6–4.9%), NBN (0.06–0.2%). There are no good marker genes for BPs as their gene expression tends to be similar to either NSC or NBN.

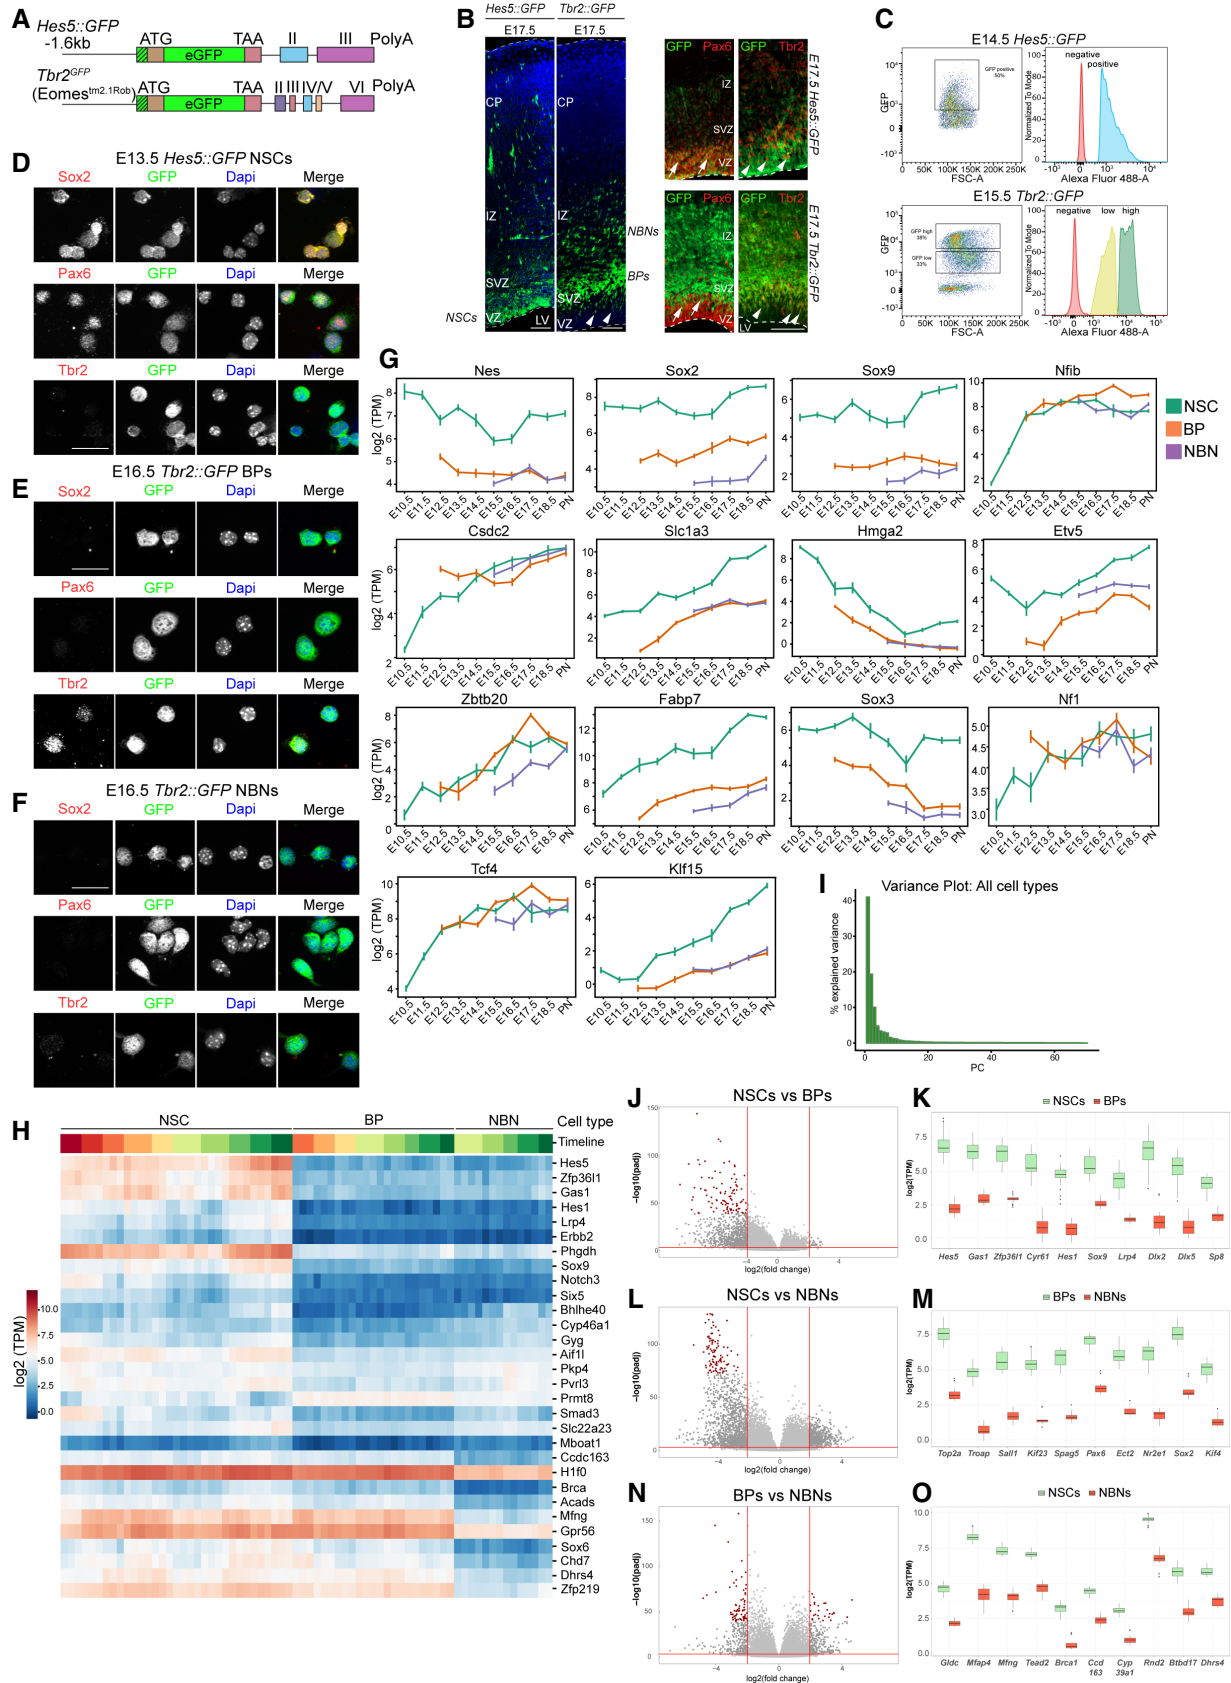

Figure EV1.

**Figure EV2. Experimental validation of transcriptional profile changes in NSCs over time.**

- A Bar plot representing the variance coverage by PC corresponding to PCA plot in Fig 2A.
- B Heatmap illustrating the expression changes in signature genes in time points corresponding to expansion, neurogenesis, and gliogenesis.
- C qPCR validation of signature genes in three zones. Each time point has samples varying from  $N = 3$  to  $N = 7$  biological replicates. (Statistical test used- Unpaired Student's  $t$ -test,  $*P < 0.05$ ,  $**P < 0.01$ ,  $***P < 0.001$ ,  $****P < 0.0001$ ).
- D–G k-Means clustering of z-scored  $\log_2$  (TPM) gene expression profiles over developmental time course in NSCs with genes showing upregulation, e.g., *Cspg4*, downregulation, e.g., *Shh*, transient downregulation, e.g., *Jag1*, transient upregulation, e.g., *Neurog2*.
- H Bar plot representing the variance coverage by PC corresponding to PCA plot in Fig 2E.

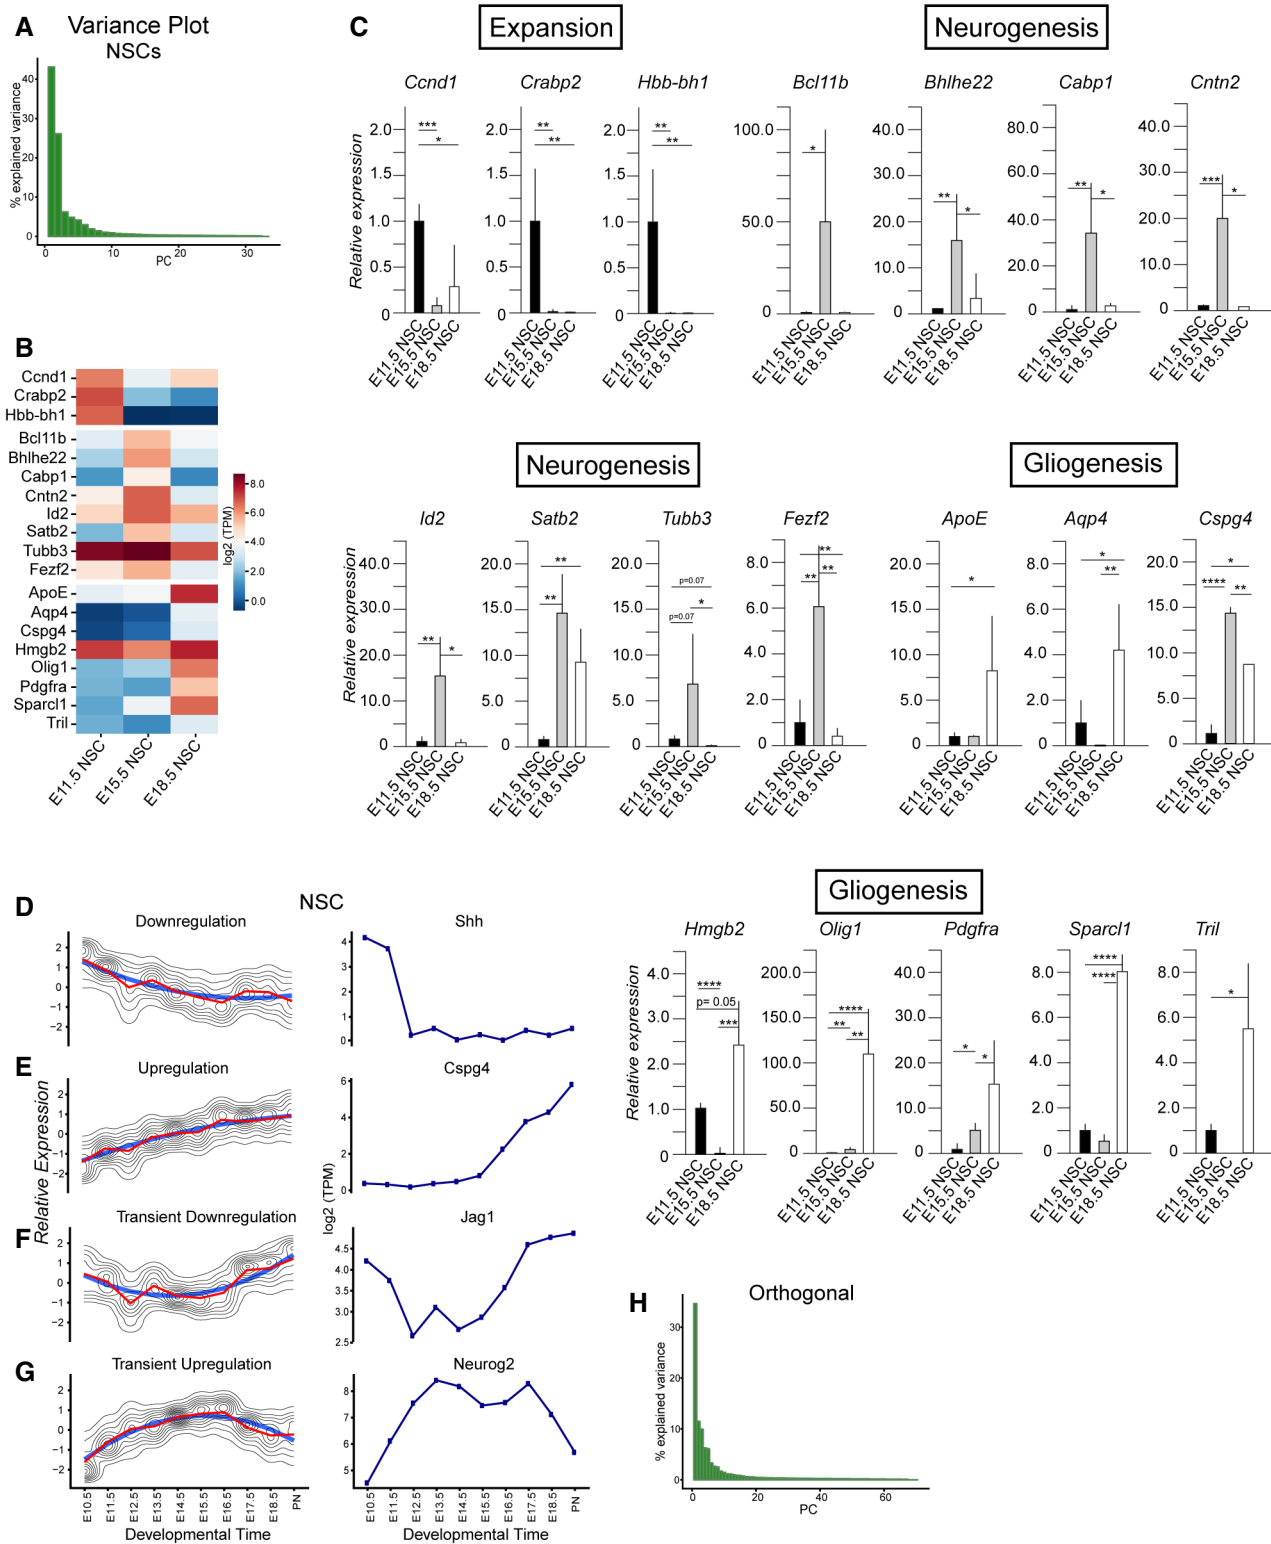

Figure EV2.

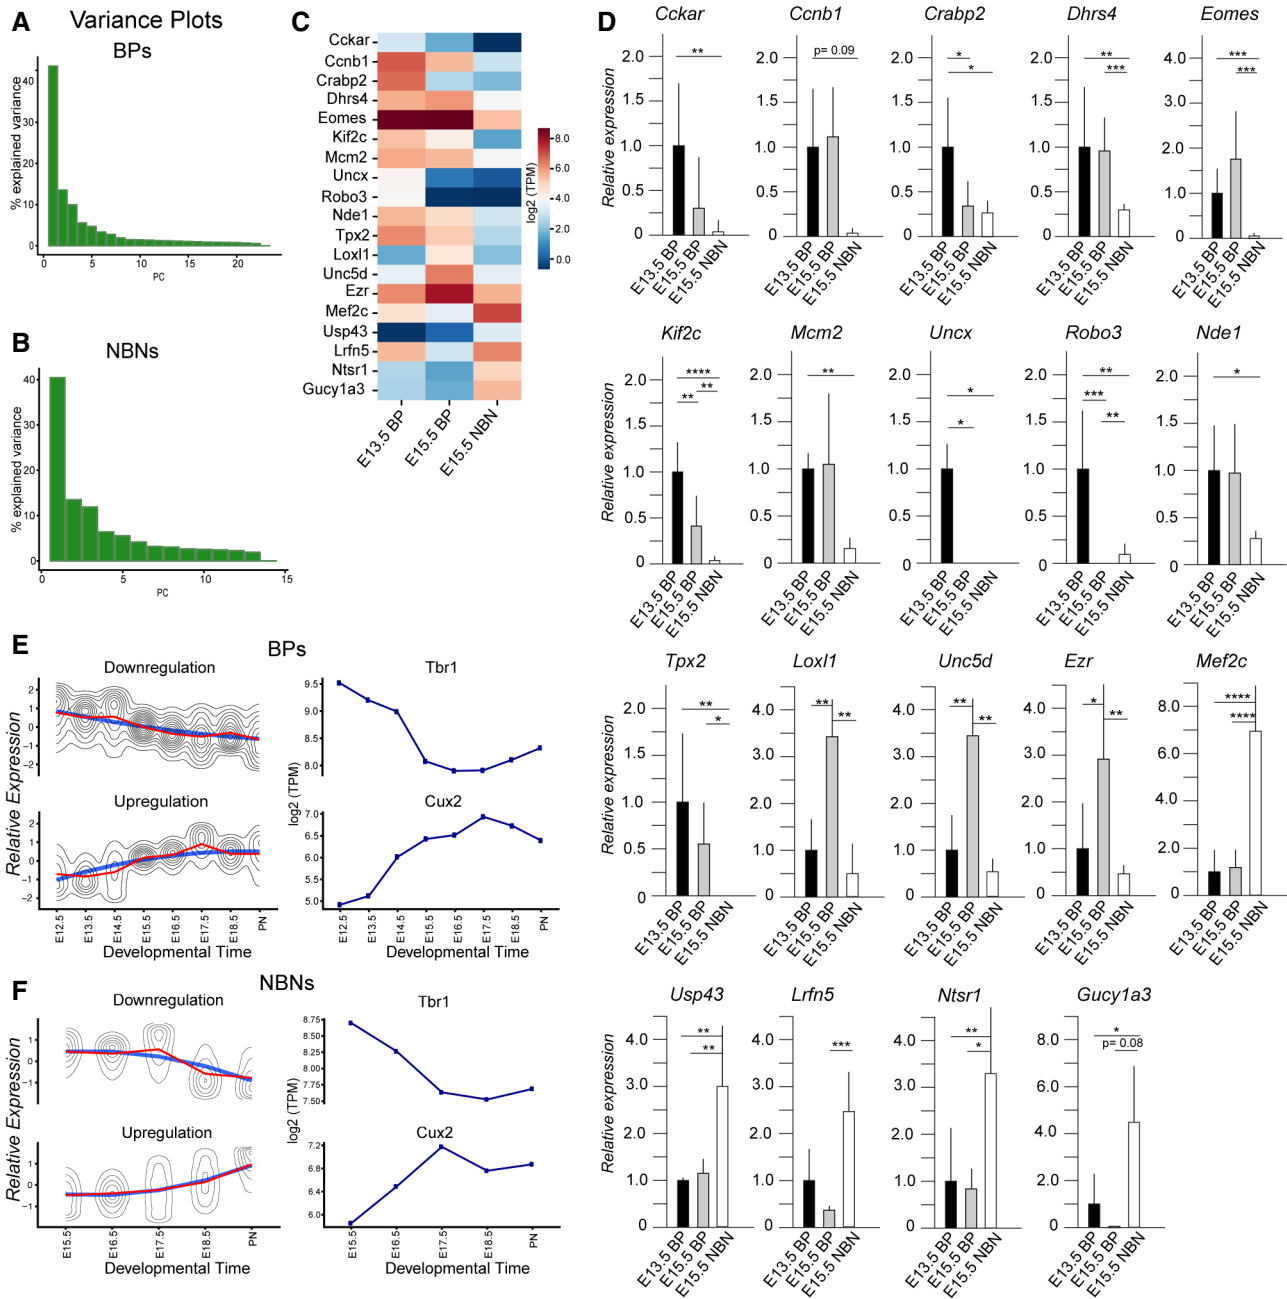

**Figure EV3. Experimental validation of transcriptional profile changes in BPs and NBNS over time.**

- A, B Bar plots representing the variance coverage by PCs corresponding to PCA plot in Fig 2I and M.
- C Heatmap illustrating the expression changes in signature genes in time points corresponding to early BPs, mid-BPs, and NBNS.
- D qPCR validation of signature genes for three sample types. Each time point has samples varying from  $N = 3$  to  $N = 7$  biological replicates (statistical test used—Unpaired Student's  $t$ -test,  $*P < 0.05$ ,  $**P < 0.01$ ,  $***P < 0.001$ ,  $****P < 0.0001$ ).
- E k-Means clustering of z-scored  $\log_2(\text{TPM})$  gene expression profiles over developmental time course in BPs with genes showing downregulation, e.g., *Tbr1* and upregulation, e.g., *Cux2*.
- F k-Means clustering of z-scored  $\log_2(\text{TPM})$  gene expression profiles over developmental time course in NBNS with genes showing downregulation, e.g., *Tbr1* and upregulation e.g., *Cux2*.

**Figure EV4. C1 data integration and comparison with Linnarsson dorsal cortex data (La Manno et al, 2021).**

- A UMAP visualization of identified clusters of NSCs, BPs and NBNs when analyzed together, segregating all cells in eight clusters—four NSC, two BP, and two NBN clusters.
- B UMAP visualization of post CCA integrated merged dataset containing C1 and dissected forebrain and dorsal forebrain cells; Linnarsson dataset from (La Manno et al, 2021), into 10 clusters.
- C UMAP clustering visualization of Linnarsson dataset with C1 data post CCA. Cells are labeled with established “Class” from original manuscript. Our NSCs and NBNs fall in Linnarsson radial glia and neuronal clusters.
- D C1 data maps onto Linnarsson clusters.
- E UMAP clustering visualization after CCA. Cells are labeled by our previously identified clusters. Our C1 clusters integrate mostly with Linnarsson radial glia and neuronal clusters and maintain their separate clustering.
- F Example feature plots showing consistent expression of markers in NSCs, BPs and NBNs between two datasets. Y-axis is the log normalized expression.
- G UMAP clustering visualization post CCA integration of C1 NSCs and radial glial classed cells from Linnarsson dataset, segregating in five clusters.
- H Positional mapping of C1 onto Linnarsson clusters.
- I After CCA integration, we find C1 NSCs integrate well with Linnarsson radial glial cells. Cells labeled with our previously identified five NSC clusters.
- J Example feature plots showing consistent expression of markers in NSCs and radial glial cells, between two datasets.
- K Example feature plots showing consistent expression of Hbb subunits in NSCs and radial glial cells, between two datasets.

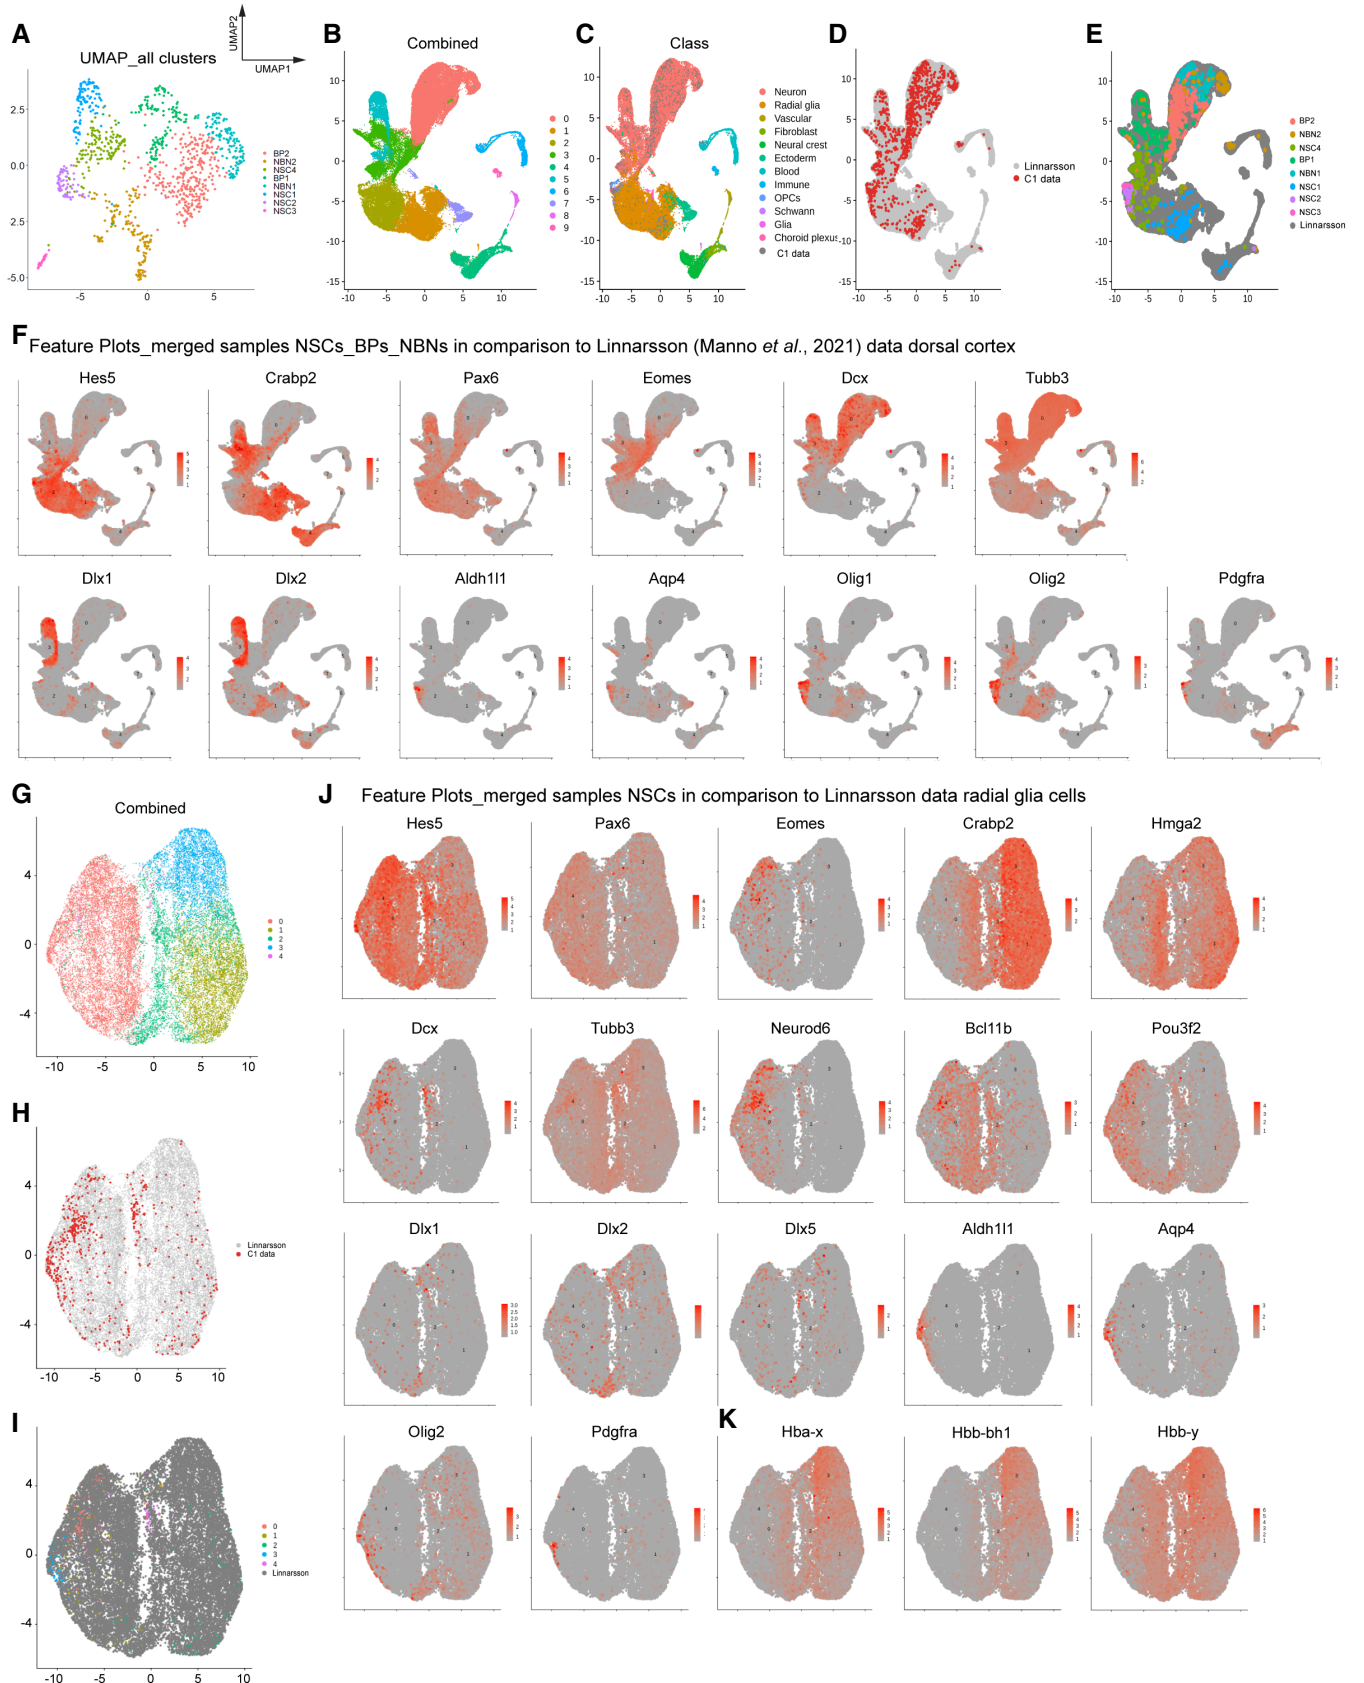

Figure EV4.

**Figure EV5. Heterogeneity of cortical layering marker expression in NSCs, BPs and NBNs.**

- A Heatmap of cortical layer markers in NSC single cells, based on z-scored  $\log_2(\text{TPM})$  expression values.
- B Heatmap of cortical layer markers in BP single cells, based on z-scored  $\log_2(\text{TPM})$  expression values.
- C Heatmap of cortical layer markers in NBN single cells, based on z-scored  $\log_2(\text{TPM})$  expression values.
- D Temporal distribution of NSC single cells along the deep or upper layer markers.
- E Temporal distribution of BP single cells along the deep or upper layer markers.
- F Temporal distribution of NBN single cells along the deep or upper layer markers.

Data Information: In (D–F), X axis: deep layer markers- Bcl11b, Tbr1, Lhx2, Lix1, Sox5, and Y axis- Cux2, Satb2, Bhlhe22, Mef2c, Mdga1.



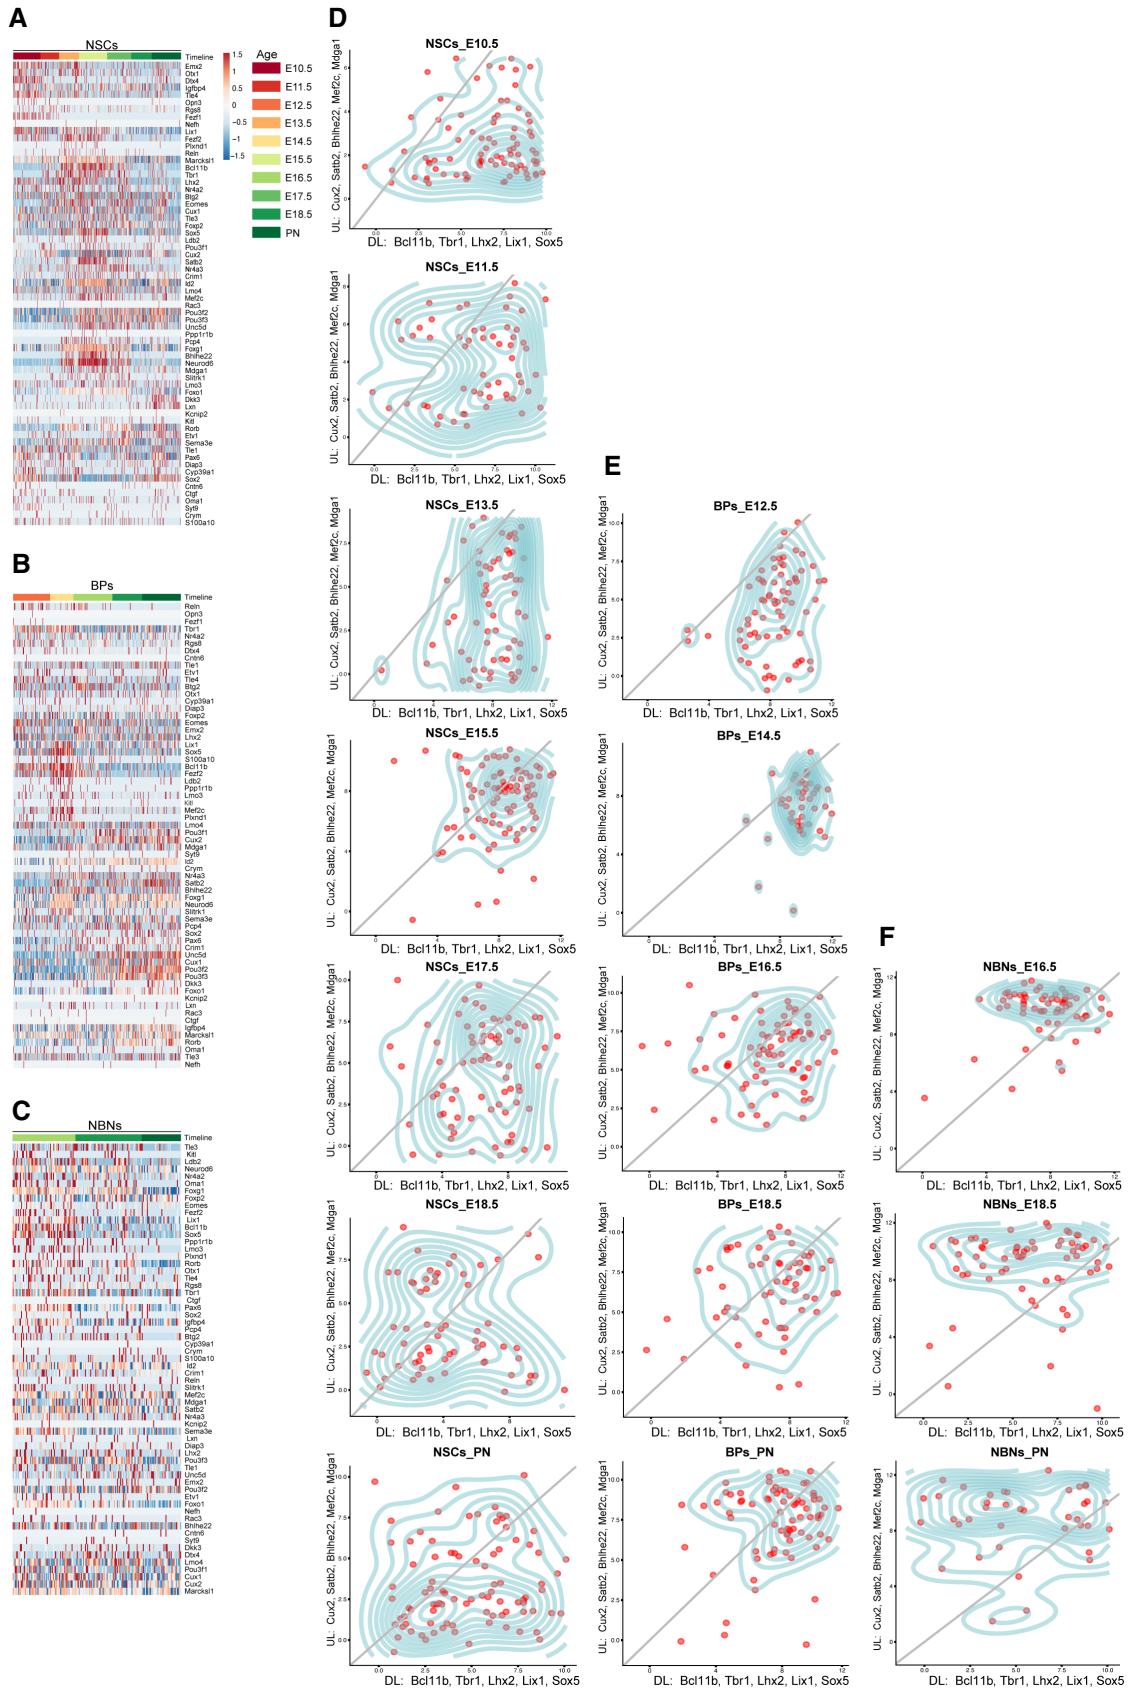

Figure EV5.
