# Supplementary material for: Temporal and sequential transcriptional dynamics define lineage shifts in corticogenesis
Source: PubMed Central journal article supplement — EMBO J. 2022 Nov 8;41(24):e111132. doi: 10.15252/embj.2022111132 (PMC9753470; doi:10.15252/embj.2022111132), 2022-11-08
Supplement: EMBJ-41-e111132-s005.pdf [file EMBJ-41-e111132-s005.pdf]

## **Appendix**

### **Table of Contents**

**Appendix Figure S1:** Dynamics of transcriptional network changes with ISMARA in different populations over time.

**Appendix Figure S2:** NSC, BP and NBN heterogeneity at single-cell level.

**Appendix Figure S3:** UMAP clustering of NSCs over time.

**Appendix Figure S4:** UMAP clustering of BPs and NBNs over time.

**Appendix Figure S5:** The NeuroStemX website.

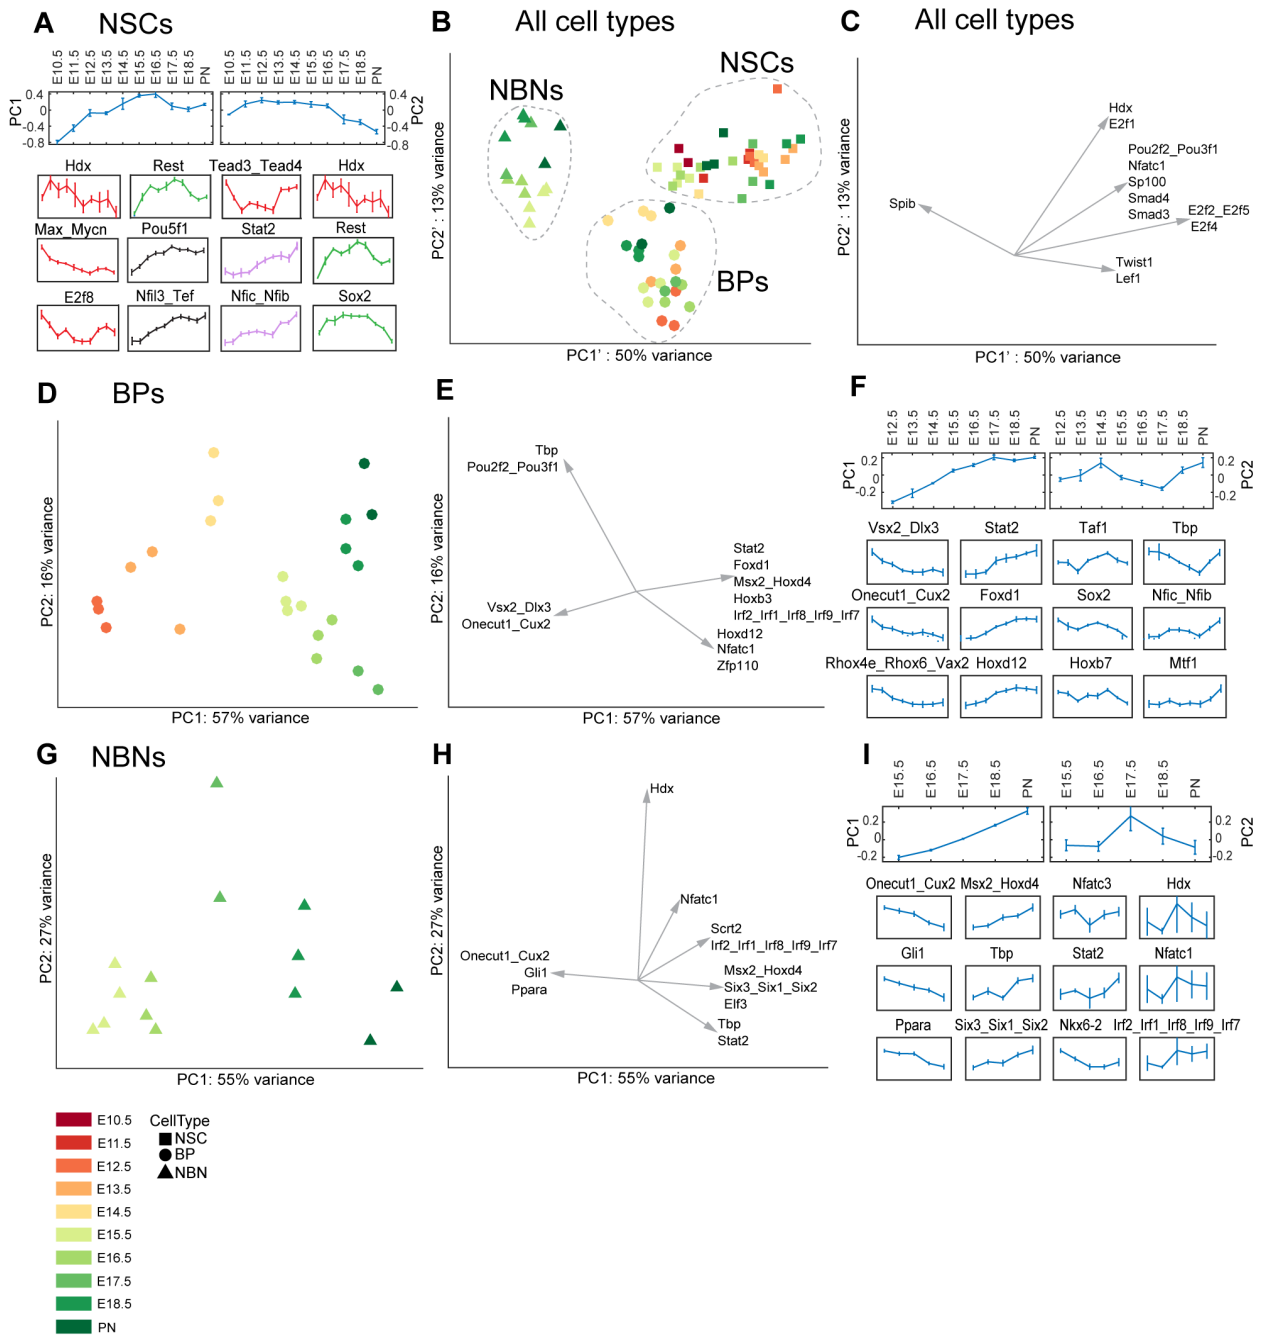

**Appendix Figure S1: Dynamics of transcriptional network changes with ISMARA in different populations over time.**

(A) Examples of dynamic motifs based on the PCA of NSCs (Figure 3B). Plots show the replicate average of samples across the sampling time for the first two principal components separately, and for the three motifs contributing the most to the first and second principal component, positively and negatively, separately.

(B) PCA plot for all cell types (NSCs, BPs and NBNs) after removing the first two components of NSC variance (from Figure 3B).

(C) Plot showing the projections of each cell type sample on the replicate average of motif activity, representing 63% of the total variance.

(D) PCA analysis on motif activity for BPs for all time points, on the first two components, representing 73% of the total variance.

(E) Top 12 motifs contributing the most to the first two principal components, projected on the first two principal components.

(F) Examples of dynamic motifs based on the PCA of BPs. Plots show the replicate average of samples across the sampling time for the first two principal components separately, and for the three motifs contributing the most to the first and second principal component, positively and negatively, separately.

(G) PCA on motif activity for NBNs for all time points, on the first two components, representing 82% of the total variance.

(H) Plot showing the projections of each cell type sample on the replicate average of motif activity, representing 82% of the total variance.

(I) Examples of dynamic motifs based on the PCA of NBNs. Plots show the replicate average of samples across the sampling time for the first two principal components separately, and for the three motifs contributing the most to the first and second principal component, positively and negatively, separately.

Data Information: In A, F and I bottom, the y-axis is the embryonic day and x-axis is  $\log_2(\text{TPM})$  expression values. The lines define the SD. 3-4 biological replicates were collected for each time point.

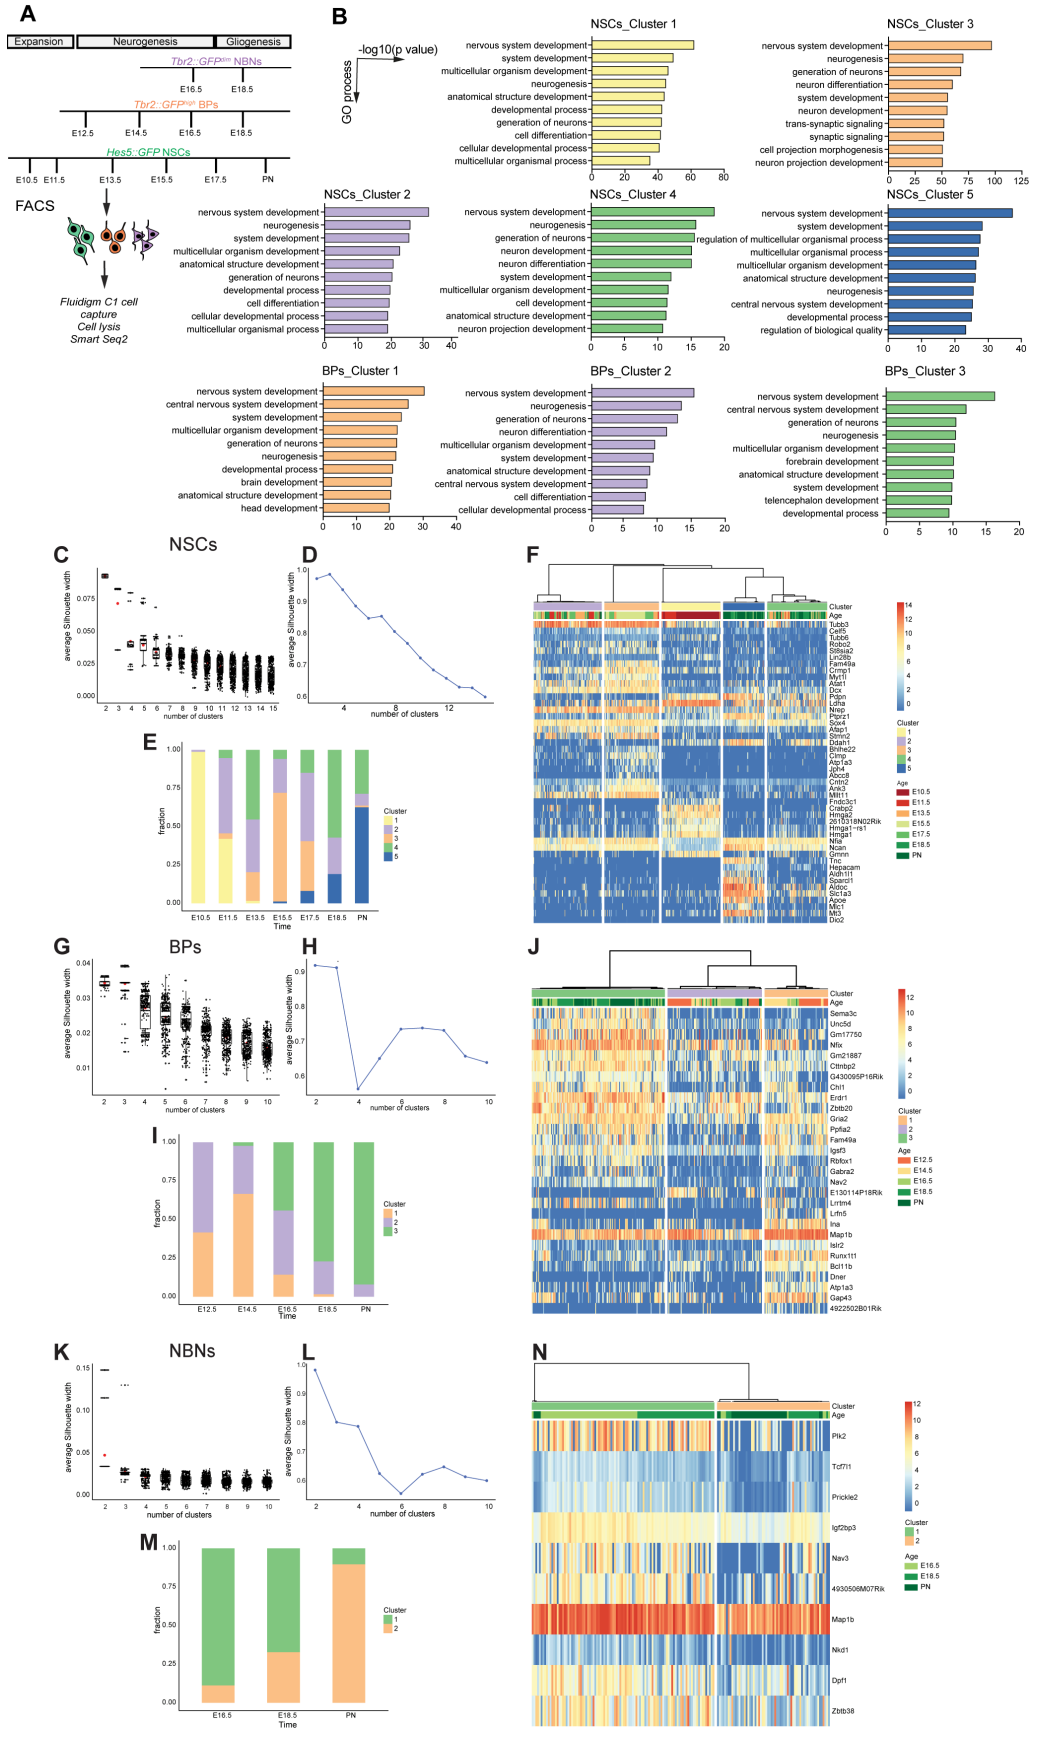

**Appendix Figure S2: NSC, BP and NBN heterogeneity at single-cell level.**

(A) Schematic representation of the experimental approach used for single cell collection used to isolate *Hes5::GFP* and *Tbr2::GFP* cells for single cell sequencing using Fluidigm C1 platform.

(B) Gene Ontology (GO) analysis of the biological process in different clusters of NSC and BP single cells. Metacore Software was used,  $-\log_{10}(p \text{ value})$  is indicated. The analyses were performed only on the clusters which are composed by 50 or more genes.

(C) Silhouette analysis where points represent the average Silhouette width of k-means clusters of NSC single cells for each k for a random initial number. For each k, 500 k-means clustering applied with different initial values. Central band is the median, red dot defines the mean, the whiskers define the upper and lower limit, and the box defines the interquartile ranges.

(D) Silhouette coefficient of hierarchical clustering of the assignment matrix of NSC single cells for different k.

(E) Bar plot shows the fractions of NSC cells at each cluster at different time points.

(F) Signature genes identified for each NSC single cell cluster.

(G) Silhouette analysis where points represent the average Silhouette width of k-means clusters of NSC single cells for each k for a random initial number. For each k, 500 k-means clustering applied with different initial values. Central band is the median, red dot defines the mean, the whiskers define the upper and lower limit, and the box defines the interquartile ranges.

(H) Silhouette coefficient of hierarchical clustering of the assignment matrix of BP single cells for different k.

(I) Bar plot shows the fractions of BP cells at each cluster at different time points.

(J) Signature genes identified for each BP single cell cluster.

(K) Silhouette analysis where points represent the average Silhouette width of k-means clusters of NSC single cells for each k for a random initial number. For each k, 500 k-means clustering applied with different initial values. Central band is the median, red dot defines the mean, the whiskers define the upper and lower limit, and the box defines the interquartile ranges.

(L) Silhouette coefficient of hierarchical clustering of the assignment matrix of BP single cells for different  $k$ .

(M) Bar plot shows the fractions of NBN cells at each cluster at different time points.

(N) Signature genes identified for each NBN single cells cluster.

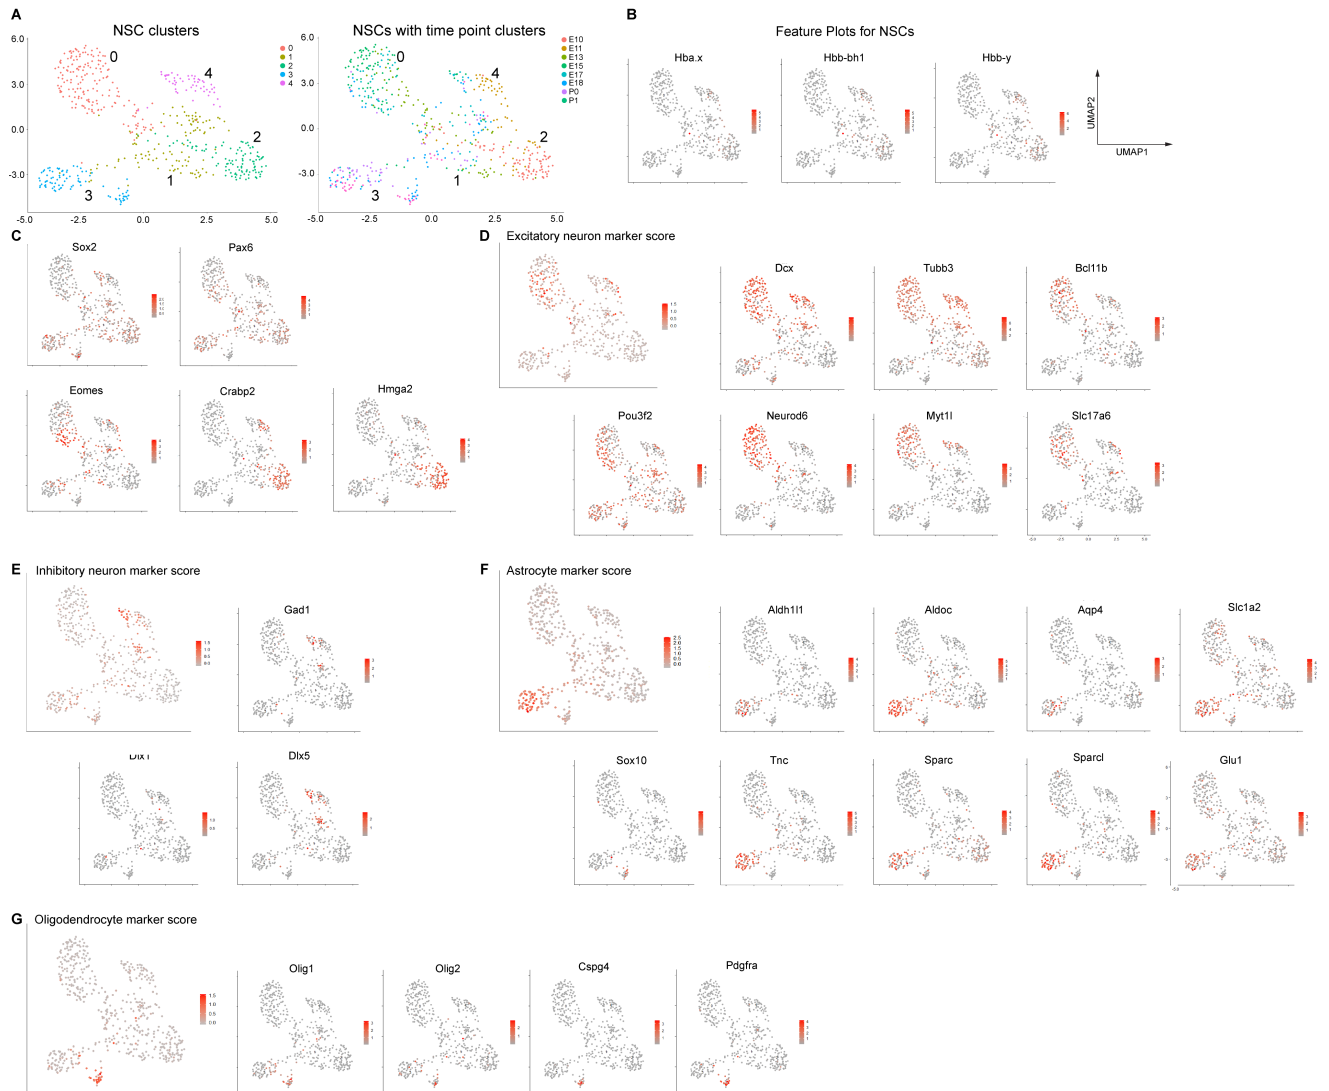

**Appendix Figure S3: UMAP clustering of NSCs over time.**

(A) NSC clusters based on UMAP visualization. UMAP clustering visualization of NSCs based on time points to be used as a reference for the feature plots in the figure.

(B) Feature plots of NSCs, for Hbb sub-units to validate to PCA analyses. Y-axis is the log normalized expression.

(C) Examples of feature plots of NSCs, for known progenitor markers, to show similarities with PCA.

(D) Feature plots of NSCs for excitatory neuron markers, highlighting the onset of neurogenic program in NSCs as observed by sc-PCA and bulk-RNA sequencing.

(E) Feature plots of NSCs for inhibitory neuron markers validating the presence of a small cluster of Dlx+ cells in the neurogenic NSCs.

(F) Feature plots of NSCs for astrocyte glial lineage shows clear segregation on UMAP clustering similar to PCA.

Feature plots of NSCs for oligodendrocyte lineage shows a cluster on UMAP similar to PCA.



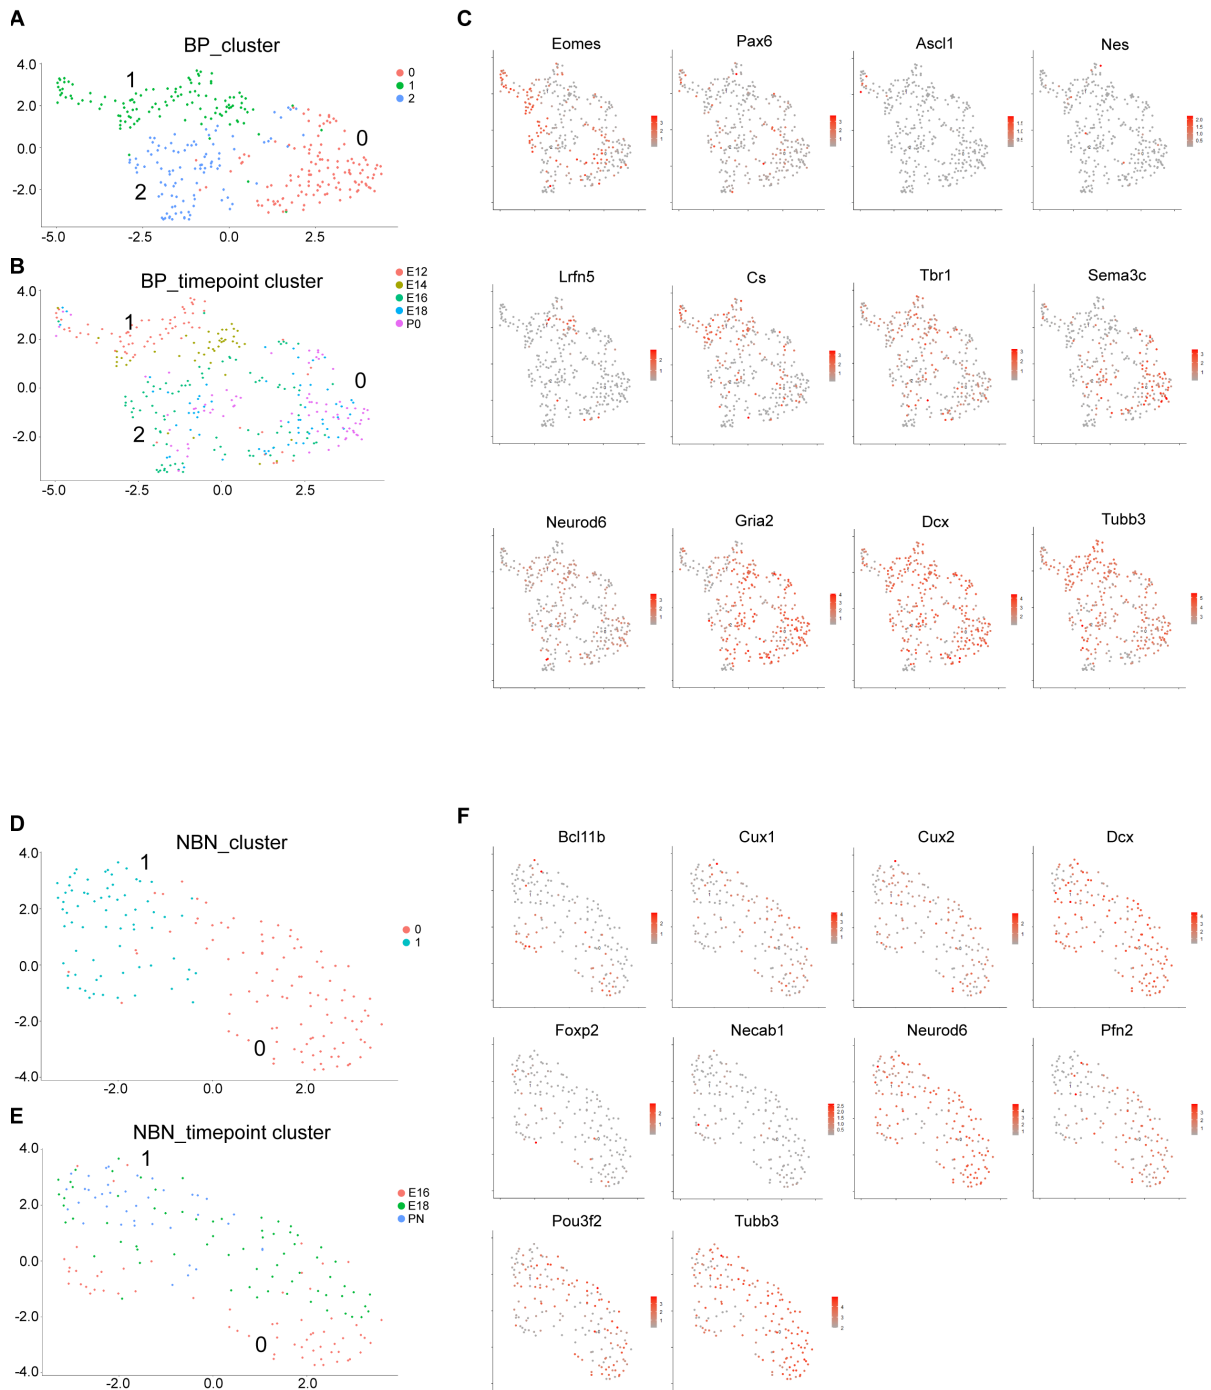

**Appendix Figure S4: UMAP clustering of BPs and NBNs over time.**

- (A) BP KNN clusters visualized with UMAP.
- (B) Collection timepoint identity of BP clusters

(C) Feature plots as example genes to show comparable expression of markers across clusters as previously observed using K-means and tSNE. Y-axis is the log normalized expression.

(D) NBN clusters visualized using UMAP.

(E) UMAP visualization of NBN timepoint collection identities two clusters.

(F) Feature plots as examples to show congruent expression of markers as previously observed using tSNE.

**A**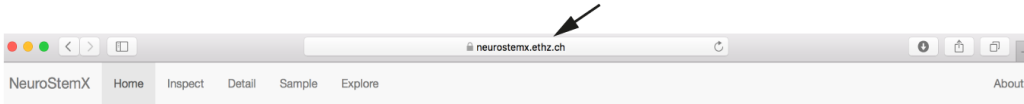**NeuroStemX Data**

|                           | Single Cell | Population |
|---------------------------|-------------|------------|
| Number of Samples         | 1014        | 70         |
| Number of Cell Types      | 3           | 3          |
| Number of Timepoints      | 10          | 10         |
| Total Number of Genes     | 23078       | 23078      |
| Number of Expressed Genes | 19697       | 22729      |

**B**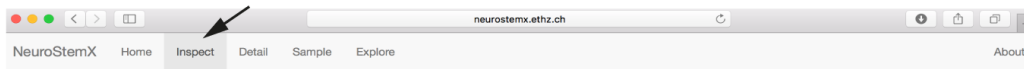**Cell Type / Timepoints**

|     | E10.5                               | E11.5                               | E12.5                               | E13.5                               | E14.5                               | E15.5                               | E16.5                               | E17.5                               | E18.5                               | PN                                  | All | None |
|-----|-------------------------------------|-------------------------------------|-------------------------------------|-------------------------------------|-------------------------------------|-------------------------------------|-------------------------------------|-------------------------------------|-------------------------------------|-------------------------------------|-----|------|
| BP  | <input type="checkbox"/>            | <input type="checkbox"/>            | <input checked="" type="checkbox"/> | <input checked="" type="checkbox"/> | <input checked="" type="checkbox"/> | <input checked="" type="checkbox"/> | <input checked="" type="checkbox"/> | <input checked="" type="checkbox"/> | <input checked="" type="checkbox"/> | <input checked="" type="checkbox"/> | All | None |
| NBN | <input type="checkbox"/>            | <input checked="" type="checkbox"/> | <input checked="" type="checkbox"/> | <input checked="" type="checkbox"/> | <input checked="" type="checkbox"/> | <input checked="" type="checkbox"/> | All | None |
| NSC | <input checked="" type="checkbox"/> | All | None |

**Genes**


**Population**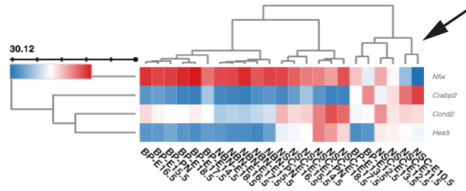**Single Cell**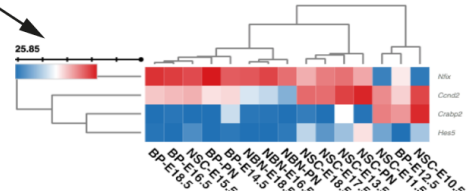**C****Cell Type / Timepoints**

|     | E10.5                               | E11.5                               | E12.5                               | E13.5                               | E14.5                               | E15.5                               | E16.5                               | E17.5                               | E18.5                               | PN                                  | All | None |
|-----|-------------------------------------|-------------------------------------|-------------------------------------|-------------------------------------|-------------------------------------|-------------------------------------|-------------------------------------|-------------------------------------|-------------------------------------|-------------------------------------|-----|------|
| BP  | <input type="checkbox"/>            | <input type="checkbox"/>            | <input checked="" type="checkbox"/> | <input checked="" type="checkbox"/> | <input checked="" type="checkbox"/> | <input checked="" type="checkbox"/> | <input checked="" type="checkbox"/> | <input checked="" type="checkbox"/> | <input checked="" type="checkbox"/> | <input checked="" type="checkbox"/> | All | None |
| NBN | <input type="checkbox"/>            | <input checked="" type="checkbox"/> | <input checked="" type="checkbox"/> | <input checked="" type="checkbox"/> | <input checked="" type="checkbox"/> | <input checked="" type="checkbox"/> | All | None |
| NSC | <input checked="" type="checkbox"/> | All | None |

**Genes**


**Population**

No heatmap

**Expression**

NSC BP NBN

Population

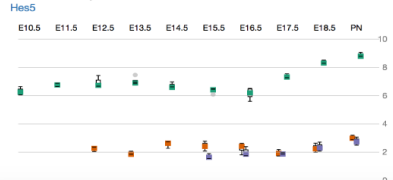**Single Cell**

No heatmap

Single Cell

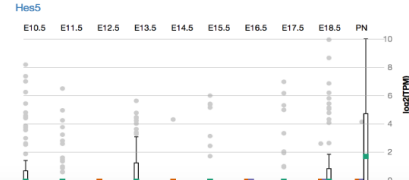

**Appendix Figure S5: The NeuroStemX website.**

(A) The online browser (<http://neurostemx.ethz.ch/>) directs to detailed population and single cell RNA sequencing analyses for NSCs, BPs and NBNs.

(B) Going through the Inspect tab, one can select the time points or genes one is interested in and click on Update. The website in real-time processes the request and displays the desired heatmaps.

(C) Example showing a query for a single gene, here, *Hes5*, yields two types of plots- population and single cell for all cell types.

(The data are in  $\log_2(\text{TPM})$ , color code as mentioned in the key).
